# Supplementary material for: Experimental alteration of DNA methylation affects the phenotypic plasticity of ecologically relevant traits in Arabidopsis thaliana
Source: Springer Nature journal article supplement (doi:10.1007/s10682-010-9372-7), 2010-03-18
Supplement: 10682_2010_9372_MOESM1_ESM.pdf [file 10682_2010_9372_MOESM1_ESM.pdf]

**Table S1** Names and geographic locations of the 20 natural accessions of *Arabidopsis thaliana* that were used in this experiment

| TAIR Stock # | TAIR Name | Origin                   |
|--------------|-----------|--------------------------|
| CS903        | Kas-1     | Kashmir, India           |
| CS932        | Abd-0     | Kingswells, Aberdeen, UK |
| CS2223       | Ws-1      | Wassilewskija, Russia    |
| CS6180       | Sha       | Pamiro-Alay, Tadjikistan |
| CS6603       | An-1      | Antwerpen, Belgium       |
| CS6608       | Bay-0     | Bayreuth, Germany        |
| CS6615       | Bl-1      | Bologna, Italy           |
| CS6643       | Bur-0     | Burren, Ireland          |
| CS6669       | Co-1      | Coimbra, Portugal        |
| CS6674       | Ct-1      | Catania, Italy           |
| CS6682       | Di-2      | Dijon, France            |
| CS6752       | Ka-0      | Karnten, Austria         |
| CS6762       | Kn-0      | Kaunas, Lithuania        |
| CS6799       | Mt-0      | Martuba, Libya           |
| CS6824       | Oy-0      | Oystese, Norway          |
| CS6863       | St-0      | Stockholm, Sweden        |
| CS6867       | Ta-0      | Tabor, Czechoslovakia    |
| CS6885       | Wa-1      | Warsaw, Poland           |
| CS6926       | Tsu-1     | Tsu, Japan               |
| CS8580       | Cvi-1     | Cape Verde               |
